# Supplementary figures and images for: One-pot Synthesis of biologically active imidazole derivative as a fluorescent probe for the detection of Ce 4+ ion
Source: Research Square preprint supplement (doi:10.21203/rs.3.rs-6498505/v1), 2025-05-09

1H-NMR spectrum of MBI

13C-NMR spectrum of MBI


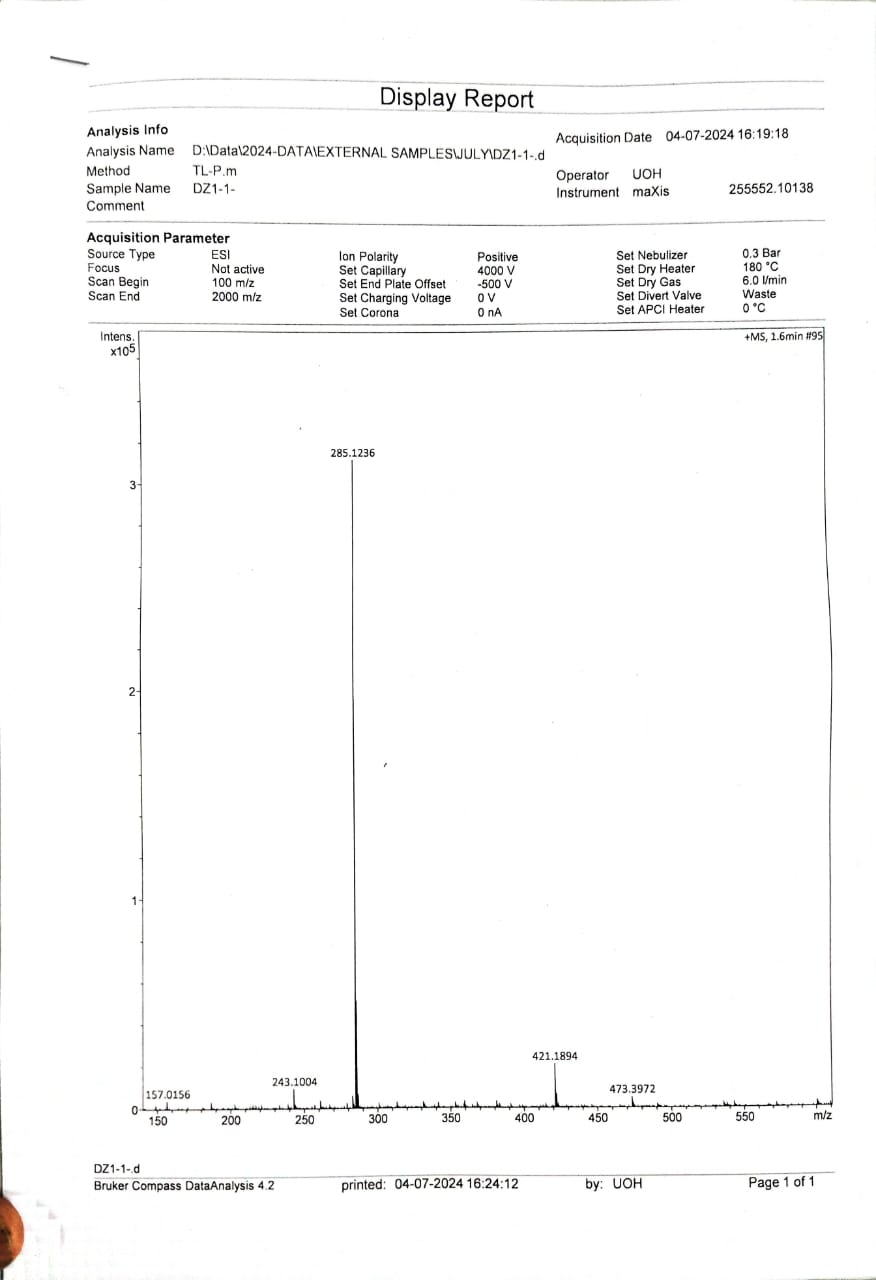


ESI spectrum of MBI

Supplement: Supplementary file 1 [file 5c8a8c0332976f0c768627ca.docx]
